# Supplementary material
Source: Springer Nature journal article supplement (https://www.springermedizin.de/resource/supplementary/12985_2010_968_MOESM1_ESM.pdf/9608850)

*Recombinant UL26c*  
*Protein Marker*  
*Negative control*

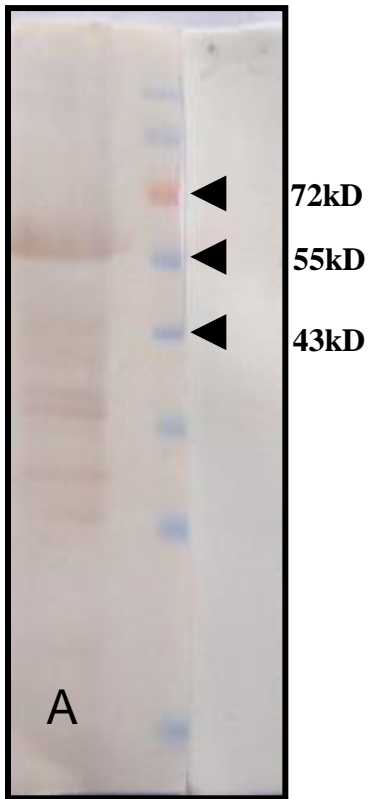

*Normal CEF*  
*CEF infected with DEV*  
*Protein Marker*

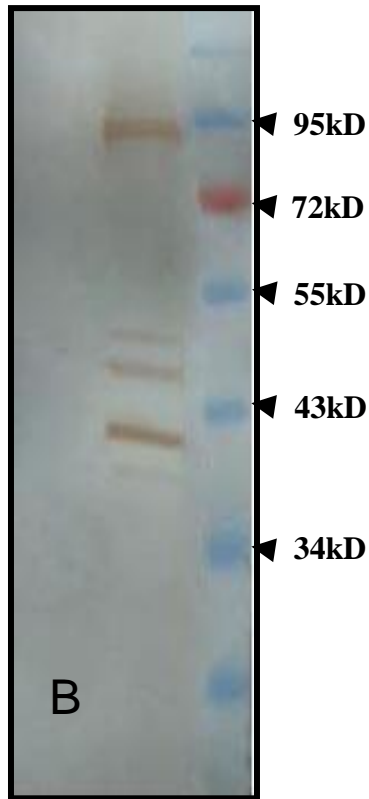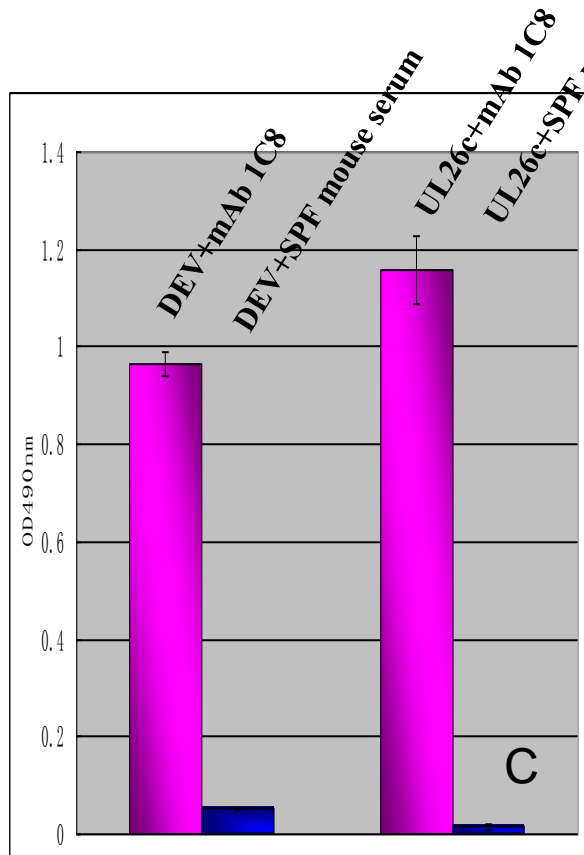

*Negative control*  
*Recombinant UL26c*  
*Protein Marker*

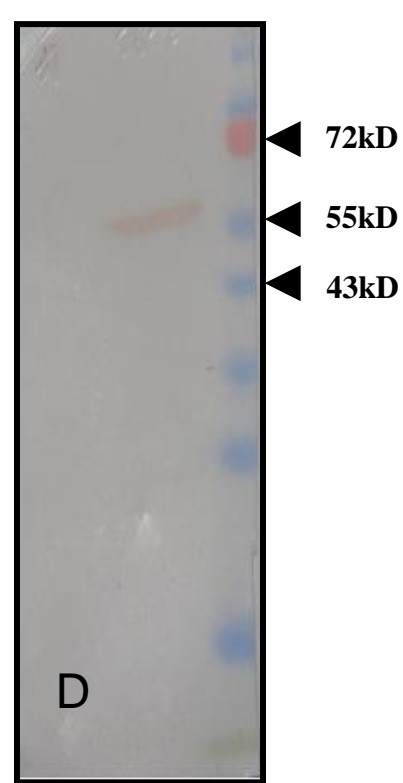

Supplement: MOESM1 [file 9608850]
